# Supplementary material
Source: PubMed Central journal article supplement (PMC3666699)
Supplement: 1305358110_pnas.201305358SI.pdf [file 1305358110_pnas.201305358SI.pdf]

# Supporting Information

Fuchino et al. 10.1073/pnas.1305358110

## SI Materials and Methods

**Construction of Strain NA1062 Containing FilP Fused to a Yellow Fluorescent Protein Ypet and FilP.** First, *filP* was replaced by *filP* fused to a yellow fluorescent protein ypet (*filP-ypet*) in cosmid 8F4 using  $\lambda$ -RED mutagenesis (1). *Ypet* linked to a chloramphenicol resistance gene (*cat*) was PCR amplified with primers containing sequences homologous to the regions flanking the desired site of insertion in *filP* sequence. The forward primer also contained the sequence encoding for a flexible linker LPGPELPGPE (2). After insertion of the cassette containing *ypet-cat* into cosmid 8F4, the *cat* gene was excised from the recombinant cosmid by the restriction enzyme *Afl*II using sites engineered in the primers, resulting in a seamless replacement of *filP* by *filP-ypet* in the native chromosomal context in 8F4. 8F4:*filP-ypet* was introduced by protoplast transformation into strain NA335 in which *filP* had been replaced by an apramycin-resistance cassette *aac(3)IV* (3). Transformants were selected first for incoming cosmid (kanamycin resistance) and in the next step screened for loss of both resistance markers. Plasmid pNA937 was introduced into the chosen

transformant strain after verification of the presence of *filP-ypet* only in the native *filP* locus by diagnostic PCR. pNA937 contains the ORF of *filP* cloned into plasmid pIJ6902 under the thiostreptone-inducible promoter *tipAp*.

**Construction of Strains NA1089 and NA1102 for Heterologous Expression of FilP and DivIVA in *E. coli*.** For the arabinose-inducible constructs, pBAD-FilP and pBAD-D4A-EGFP, *filP*, or *divIVA-GFP*, respectively, were amplified by PCR and cloned into pBAD/Myc-His vector (Invitrogen). Plasmid pKT-FilP, which enables IPTG-inducible production of FilP was obtained by using PCR to replace the T25 fragment by a stop codon in the construct pKT25-FilP. Plasmid pT-Trx-D4A-EGFP was obtained by cloning PCR-amplified *divIVA-GFP* into vector pT-Trx (4), placing *divIVA-egfp* under the control of the T7 promoter, which can be induced by IPTG in a suitable *Escherichia coli* strain, e.g., BL21. Strain NA1089 was obtained by transformation of plasmids pBAD-FilP and pT-Trx-D4A-EGFP into BL21. Strain NA1102 was obtained by transformation of plasmids pBAD-D4A-EGFP and pKT-FilP into strain DH5 $\alpha$ .

1. Gust B, Challis GL, Fowler K, Kieser T, Chater KF (2003) PCR-targeted *Streptomyces* gene replacement identifies a protein domain needed for biosynthesis of the sesquiterpene soil odor geosmin. *Proc Natl Acad Sci USA* 100(4):1541–1546.
2. Imai Y, et al. (2000) Subcellular localization of Dna-initiation proteins of *Bacillus subtilis*: Evidence that chromosome replication begins at either edge of the nucleoids. *Mol Microbiol* 36(5):1037–1048.

3. Bagchi S, Tomenius H, Belova LM, Ausmees N (2008) Intermediate filament-like proteins in bacteria and a cytoskeletal function in *Streptomyces*. *Mol Microbiol* 70(4):1037–1050.
4. Yasukawa T, et al. (1995) Increase of solubility of foreign proteins in *Escherichia coli* by coproduction of the bacterial thioredoxin. *J Biol Chem* 270(43):25328–25331.

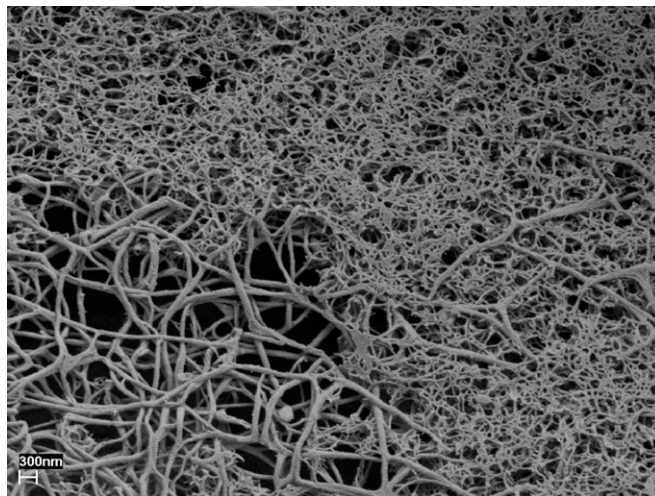

Fig. S1. Scanning electron micrograph of an extensive network of FilP filaments formed in polymix buffer.

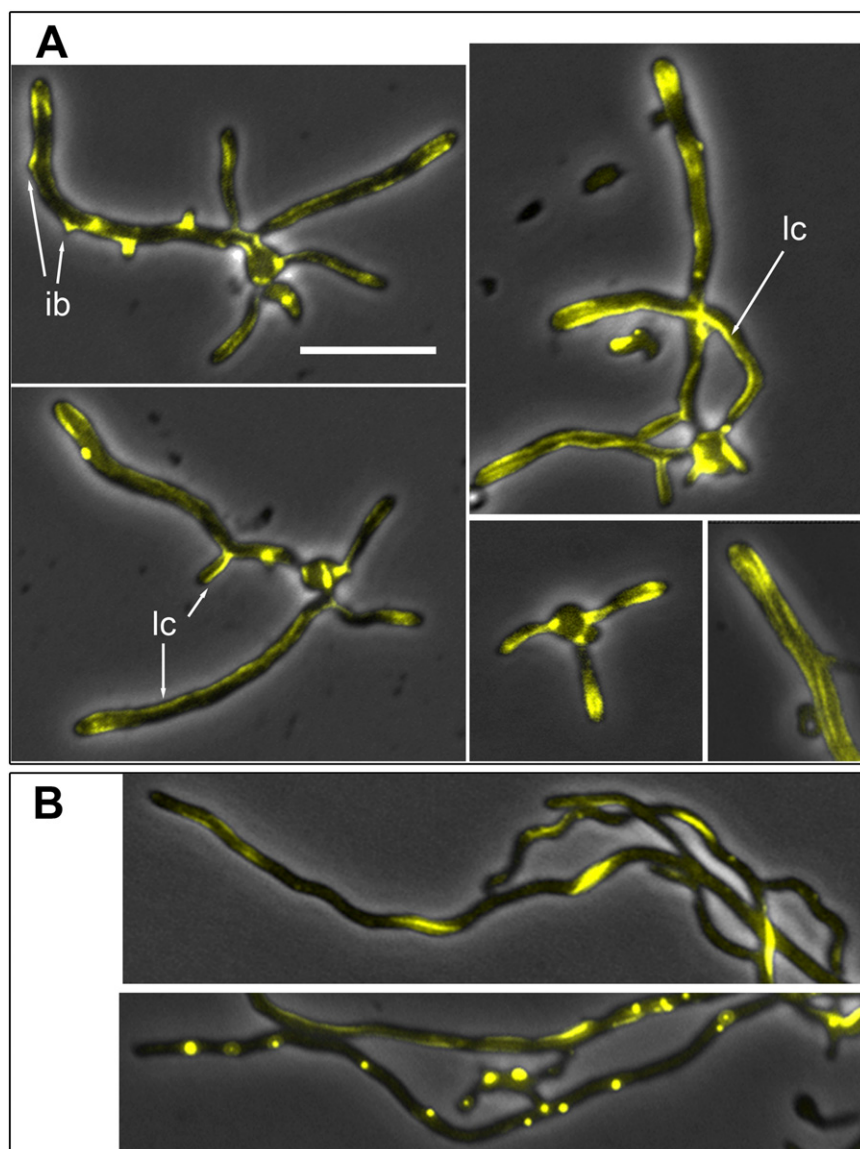

**Fig. S2.** FilP-YPet in live cells recapitulates the localization pattern of wild-type FilP visualized by immunofluorescence microscopy (IFM). Strain NA1062 (*filP-ypet*, *tipAp-filP*) was grown in liquid yeast extract-malt extract medium (YEME) without thioestrepton (*B*) or with 20  $\mu\text{g/mL}$  thioestrepton (*A*) for 19 h. The images in *A* and *B* are overlays of phase contrast and FilP-YPet fluorescence (yellow). (Scale bar: 5  $\mu\text{m}$ .) (*B*) Without thioestrepton FilP-YPet is the only source of FilP. The hyphae have a *filP* mutant phenotype (note the “wavy” shape), and FilP-YPet localizes as thick and short cables (*Upper*) or large foci (*Lower*), and no apical gradients of FilP-YPet are formed. (*A*) Upon induction of wild-type FilP, the hyphae gain a wild-type morphology, and the localization of FilP-YPet shows a dramatic change, with 70% of the hyphae containing apical gradients. Other characteristic elements of FilP localization visualized by IFM in *A*, such as lateral cables (*lc*) and accumulation at incipient branches (*ib*), are also frequently formed by FilP-YPet. Helical cables present in IFM images were the only structures of FilP not readily visualized by FilP-YPet in strain NA1062.

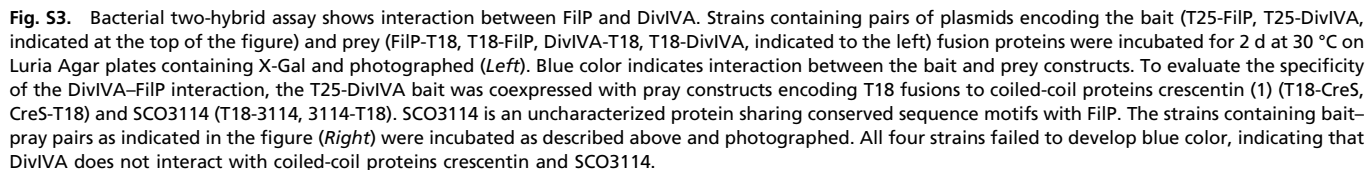

1. Holmes NA, et al. (2013) Coiled-coil protein Scv is a key component of a multiprotein assembly controlling polarized growth in *Streptomyces*. *Proc Natl Acad Sci USA* 110(5):E397–E406.

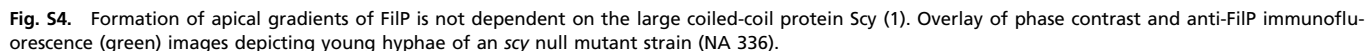

1. Holmes NA, et al. (2013) Coiled-coil protein Scy is a key component of a multiprotein assembly controlling polarized growth in *Streptomyces*. *Proc Natl Acad Sci USA* 110(5):E397–E406.

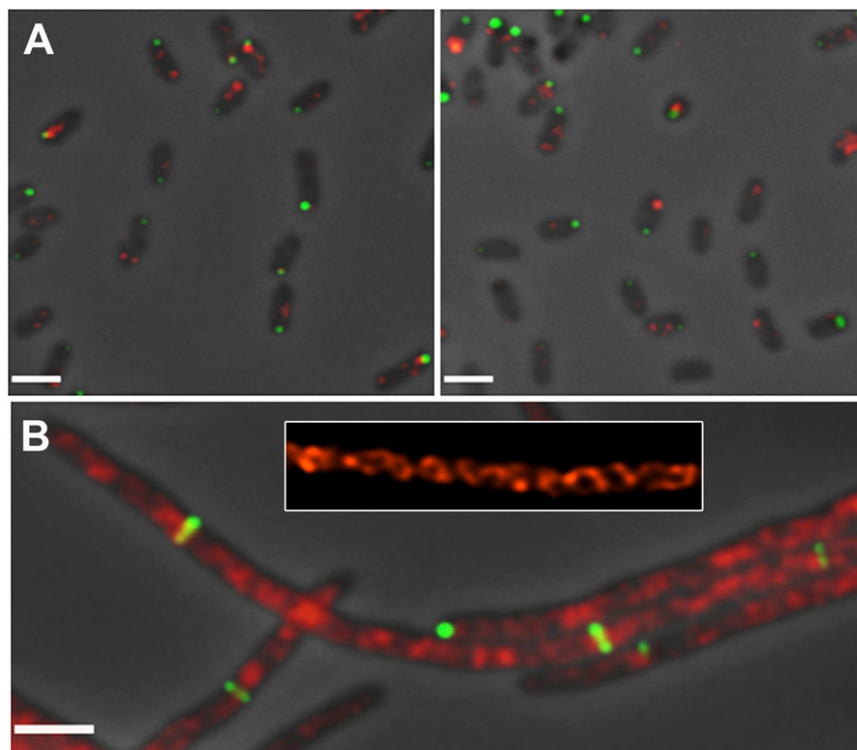

**Fig. S5.** DivIVA-EGFP does not recruit FilP in *E. coli* cells. To study whether other *Streptomyces*-specific factors are needed for the recruitment of FilP by DivIVA in vivo, *filP* and *divIVA-egfp* were coexpressed from inducible promoters in *E. coli* as a heterologous host. (A and B) All images are overlays of phase contrast, DivIVA-EGFP fluorescence (green) and anti-FilP immunofluorescence (red). (Scale bars: A, 2.20  $\mu\text{m}$ ; B, 1.60  $\mu\text{m}$ .) (A) Cells of strain NA1089 (enables arabinose-induced production of FilP and IPTG-induced production of DivIVA-EGFP) were grown in the presence of 1 mM IPTG and contain polarly localized DivIVA-EGFP (green). Production of FilP has been briefly induced by addition of 0.015% arabinose for 30 min before imaging. Small clusters of newly made FilP (red) are visible in random positions in the cells also harboring polar DivIVA-EGFP clusters, indicating that oligomerization of FilP is not dependent on DivIVA and can be nucleated anywhere in the cytoplasm. (B) Cells of strain NA1102 (harbors plasmids pBAD-D4A-EGFP and pKT-FilP) were grown in the presence of 0.15% arabinose to induce DivIVA-EGFP. FilP was expressed in a weak constitutive manner from the lactose-inducible *lac* promoter. Cephalixin was added to the growth medium (40  $\mu\text{g}/\text{mL}$ ) to inhibit cell division and cause filamentation of the cells to better resolve the spatial distribution of FilP and DivIVA. DivIVA-EGFP was observed at polar and septal sites whereas FilP appeared as a meshwork distributed throughout the cells, visually resembling the structures observed by IFM in stationary phase *Streptomyces coelicolor* hyphae. (B, Inset) A deconvolved fluorescence image of a cell. We conclude that in the heterologous host *E. coli* FilP can form cytoskeletal structures similar to those observed in *S. coelicolor*. However, because DivIVA was not able to recruit FilP in *E. coli*, formation of FilP polar gradients in *S. coelicolor* must need other *Streptomyces*-specific factors in addition to DivIVA.

**Table S1. Sensitivity of wild-type (M145) and *filP* mutant (NA883) strains to vancomycin and lysozyme**

| Strain          | V10* | V20* | L600† |
|-----------------|------|------|-------|
| M145‡           | 10.0 | 12.0 | 8.0   |
|                 | 10.0 | 12.0 | 8.0   |
|                 | 9.5  | 11.5 | 8.0   |
| $\Delta filP$ ‡ | 10.0 | 11.5 | 8.0   |
|                 | 9.5  | 11.5 | 8.5   |
|                 | 10.5 | 12.0 | 8.0   |

\*V10 and V20 indicate diameters of clearing zones around discs containing 10  $\mu\text{g}$  and 20  $\mu\text{g}$  of vancomycin, respectively. Diameters of the inhibition zones, obtained in three independent experiments, are shown in millimeters. The diameter of the discs is 6.5 mm.

†L600 indicates diameters of clearing zones around discs containing 600  $\mu\text{g}$  of lysozyme.

‡Approximately  $10^8$  spores of each strain were spread on TSA plates and grown for 8 h before filter discs containing vancomycin and lysozyme were applied, and results were scored after further overnight growth.

**Table S2. Strains and plasmids**

| Strain/plasmid       | Description                                                                                                                          | Source     |
|----------------------|--------------------------------------------------------------------------------------------------------------------------------------|------------|
| <b>Strain</b>        |                                                                                                                                      |            |
| <i>S. coelicolor</i> |                                                                                                                                      |            |
| K112                 | M145 <i>divIVA::pKF59</i> [ $\Phi$ ( <i>divIVA-egfp</i> )]                                                                           | (1)        |
| K121                 | M145 <i>divIVA::pKF59</i> [ $\Phi$ ( <i>divIVA-egfp</i> )] <i>attB<sub>pSAM2</sub>::pKF58</i> ( <i>tipAp-divIVA</i> )                | (2)        |
| K120                 | M145 <i>attB<sub>pSAM2</sub>::pKF67</i> ( <i>tipAp-FLAG-divIVA</i> )                                                                 | (3)        |
| K114                 | M145 <i>attB<sub>pSAM2</sub>::pKF58</i> ( <i>tipAp-divIVA</i> )                                                                      | (1)        |
| NA335                | M145 $\Delta$ <i>filP::[aac(3)IV oriT]</i>                                                                                           | (4)        |
| NA336                | M145 $\Delta$ <i>SCO5367::[aac(3)IV oriT]</i>                                                                                        | This study |
| NA883                | M145 $\Delta$ <i>filP::FRT</i>                                                                                                       | This study |
| NA956                | NA883 <i>attB<sub>pSAM2</sub>::pKF67</i> ( <i>tipAp-FLAG-divIVA</i> )                                                                | This study |
| NA1062               | M145 $\Delta$ <i>filP::filP-ypet attP<sub>φC31</sub>pNA937</i> ( <i>tipAp-filP</i> )                                                 | This study |
| <i>E. coli</i>       |                                                                                                                                      |            |
| DH5a                 | Cloning strain                                                                                                                       |            |
| DY380                | $\Delta$ ( <i>mrr-hsdRMS-mcrBC</i> ) <i>mcrA recA1 λ cl857 Δ(cro-bio)::tet</i> , for PCR-targeted mutagenesis                        | (5)        |
| ET12567/pUZ8002      | <i>dam-13::Tn9 dcm-6 hsdM</i> , carries RK2 derivative with defective <i>oriT</i> for plasmid mobilization                           | (6)        |
| TOP10                | Cloning strain                                                                                                                       | Invitrogen |
| BTH101               | Bacterial 2-hybrid (BTH) system, F <sup>-</sup> <i>cya-99, araD139, galE15, galk16, rpsL1 (Str<sup>r</sup>), hsdR2, mcrA1, mcrB1</i> | (7)        |
| NA1089               | BL21 harboring pBAD-FilP and pRT-Trx-D4A-EGFP                                                                                        | This study |
| NA1102               | DH5α harboring pBAD-D4A and pKT-FilP                                                                                                 | This study |
| <b>Plasmid</b>       |                                                                                                                                      |            |
| pKT25                | BTH system, encodes the T25 fragment of <i>B. pertussis</i> adenylate cyclase                                                        | (7)        |
| pUT18                | BTH system, encodes the T18 fragment of <i>B. pertussis</i> adenylate cyclase                                                        | (7)        |
| pUT18c               | BTH system, encodes the T18 fragment of <i>B. pertussis</i> adenylate cyclase                                                        | (7)        |
| pT25-FilP            | pKT25 containing <i>filP</i>                                                                                                         | This study |
| pT25-DivIVA          | pKT25 containing <i>divIVA</i>                                                                                                       | This study |
| pFilP-T18            | pUT18 containing <i>filP</i>                                                                                                         | This study |
| pT18-FilP            | pUT18c containing <i>filP</i>                                                                                                        | This study |
| pDivIVA-T18          | pUT18 containing <i>divIVA</i>                                                                                                       | This study |
| pT18-DivIVA          | pUT18c containing <i>divIVA</i>                                                                                                      | This study |
| pCreS-T18            | pUT18 containing <i>creS</i>                                                                                                         | This study |
| pT18-CreS            | pUT18c containing <i>creS</i>                                                                                                        | This study |
| p3114-T18            | pUT18 containing <i>SCO3114</i>                                                                                                      | This study |
| pT18-3114            | pUT18c containing <i>SCO3114</i>                                                                                                     | This study |
| pNA937               | pJ6902 containing <i>filP</i> ( <i>tipAp-filP</i> ) for thiostrepton-inducible expression of FilP                                    | This study |
| pBAD-FilP            | Vector pBAD/Myc-His containing <i>filP</i>                                                                                           | This study |
| pBAD-D4A-EGFP        | Vector pBAD/Myc-His containing <i>divIVA-egfp</i>                                                                                    | This study |
| pKT-FilP             | Derivative of pKT25-FilP with deletion of T25                                                                                        | This study |
| pT-Trx-D4A-EGFP      | Vector pT-Trx containing <i>divIVA-egfp</i>                                                                                          | This study |

- Flårdh K (2003) Essential role of DivIVA in polar growth and morphogenesis in *Streptomyces coelicolor* A3(2). *Mol Microbiol* 49(6):1523–1536.
- Hempel AM, Wang SB, Letek M, Gil JA, Flårdh K (2008) Assemblies of DivIVA mark sites for hyphal branching and can establish new zones of cell wall growth in *Streptomyces coelicolor*. *J Bacteriol* 190(22):7579–7583.
- Wang SB, et al. (2009) Domains involved in the in vivo function and oligomerization of apical growth determinant DivIVA in *Streptomyces coelicolor*. *FEMS Microbiol Lett* 297(1): 101–109.
- Bagchi S, Tomenius H, Belova LM, Ausmees N (2008) Intermediate filament-like proteins in bacteria and a cytoskeletal function in *Streptomyces*. *Mol Microbiol* 70(4):1037–1050.
- Lee EC, et al. (2001) A highly efficient *Escherichia coli*-based chromosome engineering system adapted for recombinogenic targeting and subcloning of BAC DNA. *Genomics* 73(1): 56–65.
- Kieser T, Bibb MJ, Buttner MJ, Chater KF, Hopwood D (2000) *Practical Streptomyces Genetics* (The John Innes Foundation, Norwich, UK).
- Karimova G, Ullmann A, Ladant D (2000) A bacterial two-hybrid system that exploits a cAMP signaling cascade in *Escherichia coli*. *Methods Enzymol* 328:59–73.

| Primer | Sequence                                                                                      | Use                                                 |
|--------|-----------------------------------------------------------------------------------------------|-----------------------------------------------------|
| N228   | ATTTTACATATGGCTAGCAGCGACACTTCCCCCTACGGC                                                       | Cloning of pNA937                                   |
| N231   | TAAAAATGAATTGCTCGTCGTAGTGCTTGCCGT                                                             | Cloning of pNA937 and pBAD-FilP                     |
| N242   | ATTTAGGATCCCATGAGACTGTGTGCAAGAACT                                                             | Cloning of pCreS-T18 and pT18-CreS                  |
| N243   | ATTTAGGTACCGCGGCGCTCGCGCCACGTCGCCGT                                                           | Cloning of pCreS-T18 and pT18-CreS                  |
| N482   | ATTATATCTAGAGAGCGGTGCATCGGCGTCT                                                               | Cloning of p3114-T18 and pT18-3114                  |
| N483   | TATTAAGGTACCCATTCCACCTCCACCGCACG                                                              | Cloning of p3114-T18 and pT18-3114                  |
| N486   | AATATTCTAGAGCCGTTGACCCCCGAGGAC                                                                | Cloning of pDivIVA-T18, pT18-DivIVA and pT25-DivIVA |
| N487   | TATATTGGTACCCAGTTGTGCTCTCGTCGA                                                                | Cloning of pDivIVA-T18, pT18-DivIVA and pT25-DivIVA |
| N488   | TAATATTCTAGAGAGCGACACTTCCCCCTAC                                                               | Cloning of pFilP-T18, pT18-FilP and pT25-FilP       |
| N489   | TTATAAGGTACCATGCGGGACTGCTGGGCCGG                                                              | Cloning of pFilP-T18, pT18-FilP and pT25-FilP       |
| N516   | AGCGACACTTCCCCCTACG                                                                           | Cloning of pKT-FilP                                 |
| N517   | CATAGCTGTTTCCTGTGTG                                                                           | Cloning of pKT-FilP                                 |
| N518   | CCGTTGACCCCCGAGGACG                                                                           | Cloning of pBAD-D4A-EGFP                            |
| N519   | CAGTGAATAACTGCAGTTACTTGTACAGCTCGTCCATG                                                        | Cloning of pBAD-D4A-EGFP                            |
| N534   | TTCGGCAGGCGTACCCCCGCGCAGCCGAAACCGCCCG<br>GGCGCAAGGGCGCTTAAGTCTAGAGTCTGCATGCCTGC               | Generating NA1062                                   |
| N535   | CGAGTCGGTCTCCCGCGGGGTCCCGGCCAGCAGTCC<br>CGCTGCCCCGCCCGAGCTCCCGGCCCGGAGA<br>TGGTGAGCAAAGGCAAGA | Generating NA1062                                   |
| N562   | CCATGGGGAGCGCAGCACTTCCCCCTACG                                                                 | Cloning of pBAD-FilP                                |
| N563   | ATTTTACATATGCCGTTGACCCCCGAGG                                                                  | Cloning of pT-Trx-D4A-EGFP                          |
| N564   | ATTTTAAAGCTTTTACTTGTACAGCTCGTCCATG                                                            | Cloning of pT-Trx-D4A-EGFP                          |
